# Supplementary material for: Hollow NiCo-LDH polyhedrons for 1-second level humidity detection and respiratory monitoring
Source: Royal Society of Chemistry journal article supplement (doi:10.1039/d4nj04001e), 2024-01-01
Supplement: d4nj04001e1.pdf [file d4nj04001e1.pdf]

# Hollow NiCo-LDH polyhedrons for 1-second level humidity detection and respiratory monitoring

Luyu Wang<sup>a\*</sup>, Chenghai Ruan<sup>b</sup>, Chunyang Yu<sup>b</sup>, Jia Song<sup>c\*</sup>

<sup>a</sup> College of Artificial Intelligence and E-Commerce, Zhejiang Gongshang University

Hangzhou College of Commerce, Hangzhou, 311599, China

<sup>b</sup> Design-AI Laboratory, China Academy of Art, Hangzhou 310009, China

<sup>c</sup> School of Nuclear Science and Engineering, Shanghai Jiao Tong University,

Shanghai, 200240, China

## \*Corresponding Author

Luyu Wang: Dr.Luyu-Wang@hotmail.com

Chenghai Ruan: ruan@enjoywater.com.cn

Chunyang Yu: [yucyzju@hotmail.com](mailto:yucyzju@hotmail.com)

Jia Song: [songjia111@sjtu.edu.cn](mailto:songjia111@sjtu.edu.cn)

**Keywords:** Humidity sensor; Quartz crystal microbalance; NiCo-LDH; Respiration Monitoring

## 1. The Chemical Raw Materials

2-Methylimidazole,  $\text{Co}(\text{NO}_3)_2 \cdot 6\text{H}_2\text{O}$ ,  $\text{Ni}(\text{NO}_3)_2 \cdot 6\text{H}_2\text{O}$ , methanol and ethanol were purchased from Macklin (Shanghai, China). All reagents and chemicals are of analytical grade and was used directly without further purification.

## 2. Synthesis of ZIF-67

0.249 g  $\text{Co}(\text{NO}_3)_2 \cdot 6\text{H}_2\text{O}$  and 0.328 g 2-Methylimidazole were separately dissolved in 25 mL methanol. Then, the solution of 2-Methylimidazole was quickly added to the  $\text{Co}(\text{NO}_3)_2 \cdot 6\text{H}_2\text{O}$  solution, which was stirred for 10 min and aged at room temperature for 48 h. Afterwards, the mixture was washed by centrifuging with methanol and dried at 60 °C, and then heated at 400 °C (2 °C min<sup>-1</sup>) for 2 h under N<sub>2</sub>.

## 3. Synthesis of hollow NiCo-LDH polyhedrons

For preparing hollow NiCo-LDH polyhedrons, 60 mg ZIF-67 and 180 mg  $\text{Ni}(\text{NO}_3)_2 \cdot 6\text{H}_2\text{O}$  were dissolved in 15 mL ethanol separately, which were ultrasonic treated for 10 min. The mixture was hydrothermally reacted at 80°C for 6 h. Products were obtained by centrifugation and washing.

## 2. Characterization

The morphology of hollow NiCo-LDH polyhedrons was observed by scanning electron microscope (SEM, Germany ZEISS Sigma 300) and transmission electron microscopy (TEM, Japan JEOL JEM F200). Wide angle X-ray diffraction patterns of the materials were obtained on a Germany Bruker D2 Phaser diffractometer using Cu

KR radiation. Nitrogen adsorption-desorption isotherms were measured at 77 K by using a surface area and porosity analyzer (Micromeritics ASAP 2020). The materials were degassed before the measurements. The BET method was used to extract the specific surface areas. FT-IR spectra of the sample was measured on an FTIR-8400s (Shimadzu) spectrometer in the transmission mode. Standard KBr technique was applied.

### **3. Fabrication and Test Methods of the QCM humidity Sensor**

Prior to measurements, QCM sensors ultrasonic cleaning was successively carried out three times in acetone, ethanol and deionized water for 10 min, respectively. Then the sensors were dried at 40 °C for 30 min. After obtaining clean crystals chips, the corresponding frequency was recorded as the fundamental frequency. The as-prepared 20 mg/mL hollow NiCo-LDH polyhedrons dispersions were dropped on silver surface of the QCM chips. In order to evaluate the effect of the depositing amount of hollow NiCo-LDH polyhedrons on sensor performance, the sensors with 1, 2, and 3  $\mu$ L of hollow NiCo-LDH polyhedrons deposited on the electrode of QCMs were fabricated. The corresponding sensors were labeled as LDH-1, LDH-2 and LDH-3. After drying at 40 °C for 40 min, hollow NiCo-LDH polyhedrons modified QCM humidity sensors were successfully made. Then, the frequencies of all sensors were recorded. The details were exhibited as in Table 1. The humidity-sensing experiments were performed at room temperature (298 K). In order to explore the capability of humidity detection, a man-made measure setup is sketched in Fig. S1. The sensor was exposed to relative humidity (RH) level of 11%, 33%, 52%, 75%, and 97% produced by the saturated

solution of LiCl, MgCl<sub>2</sub>, Mg(NO<sub>3</sub>)<sub>2</sub>, NaCl, and K<sub>2</sub>SO<sub>4</sub>, respectively. The superabsorbent P<sub>2</sub>O<sub>5</sub> powder was used as a desiccant in a vessel to provide a relative dry atmosphere (ca. 0% RH) as the baseline environment <sup>1</sup>. The real-time resonant frequency of QCM transducer was recorded by a frequency counter. In order to know the deposition amount of hollow NiCo-LDH polyhedrons on the electrode of QCMs, the resonance frequencies values before and after films deposition were measured, which was shown in Table 1. The deposition mass of hollow NiCo-LDH polyhedrons on the electrode of QCMs were calculated according to the Sauerbrey equation.

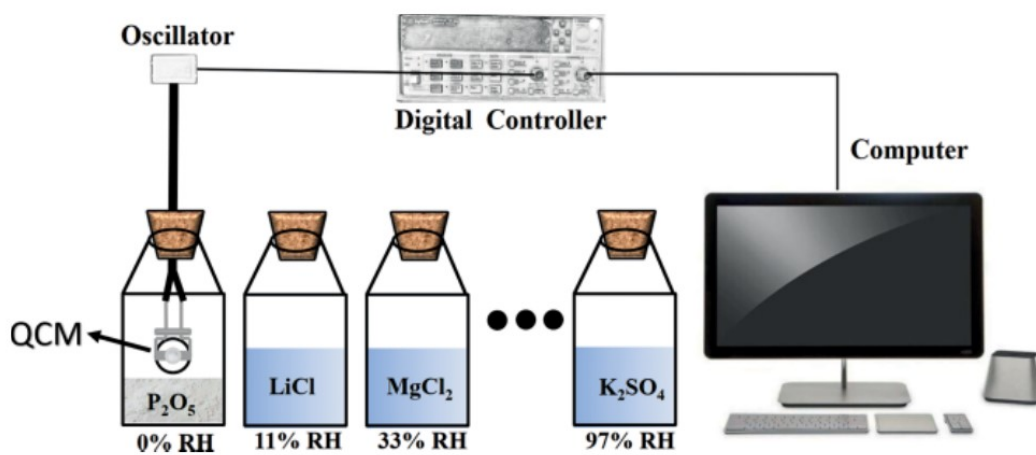

**Fig. S1.** The sketch diagram of humidity detection system.

## References

- 1 L. Wang, J. Wen, Y. Wu and J. Gao, *Zeitschrift Fur Anorg. Und Allg. Chemie*, 2020, **646**, 1655–1659.
